# Supplementary material for: The Ambivalent Appraisal of Job Demands and the Moderating Role of Job Control and Social Support for Burnout and Job Satisfaction
Source: Springer Nature journal article supplement (doi:10.1007/s11205-019-02195-9), 2019-10-11
Supplement: MOESM1 [file 17266144]

Online Resource 1: Simple slopes and conditional (instantaneous) indirect effects

|                                                        | Simple slopes  | Conditional (instantaneous) indirect effects |                |                            |                |
|--------------------------------------------------------|----------------|----------------------------------------------|----------------|----------------------------|----------------|
|                                                        |                | Outcome: Burnout                             |                | Outcome: Work satisfaction |                |
|                                                        |                | Estimates                                    | BC 95% CI      | Estimates                  | BC 95% CI      |
| <b>Work demand: Task Complexity (TC)</b>               |                |                                              |                |                            |                |
| <i>TC<sup>2</sup>--&gt; Challenge</i>                  |                |                                              |                |                            |                |
| Low TC                                                 | .761*** (.080) | -.043                                        | [-.112, .018]  | .122*                      | [.049, .215]   |
| Mean TC                                                | .461*** (.042) | -.026                                        | [-.067, .011]  | .074*                      | [.029, .128]   |
| High TC                                                | .161 (.085)    | -.009                                        | [-.037, .002]  | .026*                      | [.002, .073]   |
| <i>TC*Control --&gt; Hindrance</i>                     |                |                                              |                |                            |                |
| Low Control                                            | .380*** (.071) | .101*                                        | [.060, .153]   | -.043*                     | [-.088, -.013] |
| Mean Control                                           | .232*** (.049) | .064*                                        | [.036, .099]   | -.026*                     | [-.054, -.008] |
| High Control                                           | .084 (.062)    | .026                                         | [-.008, .064]  | -.010                      | [-.032, .003]  |
| <b>Work demand: Interruptions (INT)</b>                |                |                                              |                |                            |                |
| <i>INT<sup>2</sup>*Control --&gt; Challenge</i>        |                |                                              |                |                            |                |
| Low INT and Low Control                                | .344** (.130)  | -.043*                                       | [-.105, -.011] | .033*                      | [.005, .085]   |
| Mean INT and Low Control                               | .016 (.061)    | -.002                                        | [-.019, .015]  | .002                       | [-.010, .017]  |
| High INT and Low Control                               | -.312* (.129)  | .039*                                        | [.007, .097]   | -.029*                     | [-.077, -.004] |
| Low INT and Mean Control                               | .185 (.117)    | -.023                                        | [-.068, .002]  | .018                       | [-.001, .058]  |
| Mean INT and Mean Control                              | .049 (.049)    | -.006                                        | [-.022, .005]  | .005                       | [-.003, .019]  |
| High INT and Mean Control                              | -.088 (.097)   | .011                                         | [-.011, .046]  | -.008                      | [-.037, .007]  |
| Low INT and High Control                               | .026 (.191)    | -.003                                        | [-.058, .046]  | .003                       | [-.031, .048]  |
| Mean INT and High Control                              | .081 (.072)    | -.010                                        | [-.033, .007]  | .008                       | [-.004, .028]  |
| High INT and High Control                              | .137 (.145)    | -.017                                        | [-.063, .017]  | .013                       | [-.011, .052]  |
| <i>Work demand<sup>2</sup>*Support--&gt; Hindrance</i> |                |                                              |                |                            |                |
| Low INT and Low Support                                | .871*** (.073) | .179*                                        | [.093, .275]   | -.097*                     | [-.178, -.020] |
| Mean INT and Low Support                               | .607*** (.037) | .125*                                        | [.065, .190]   | -.068*                     | [-.124, -.014] |
| High INT and Low Support                               | .344*** (.084) | .071*                                        | [.030, .132]   | -.038*                     | [-.085, -.009] |
| Low INT and Mean Support                               | .715*** (.069) | .147*                                        | [.073, .231]   | -.080*                     | [-.147, -.017] |
| Mean INT and Mean Support                              | .560*** (.033) | .115*                                        | [.061, .177]   | -.062*                     | [-.114, -.013] |
| High INT and Mean Support                              | .405*** (.072) | .083*                                        | [.042, .141]   | -.045*                     | [-.093, -.012] |
| Low INT and High Support                               | .559*** (.103) | .115*                                        | [.051, .203]   | -.062*                     | [-.126, -.013] |
| Mean INT and High Support                              | .512*** (.048) | .105*                                        | [.055, .166]   | -.057*                     | [-.106, -.012] |
| High INT and High Support                              | .466*** (.104) | .096*                                        | [.046, .172]   | -.051*                     | [-.111, -.014] |
| <i>INT*Control --&gt; Hindrance</i>                    |                |                                              |                |                            |                |
| Low Control                                            | .636*** (.045) | .131*                                        | [.068, .204]   | -.071*                     | [-.129, -.015] |
| Mean Control                                           | .560*** (.033) | .115*                                        | [.061, .177]   | -.062*                     | [-.114, -.013] |
| High Control                                           | .483*** (.049) | .099*                                        | [.053, .157]   | -.054*                     | [-.101, -.012] |
| <b>Work demand: Responsibility (RES)</b>               |                |                                              |                |                            |                |
| <i>RES<sup>2</sup>--&gt; Challenge</i>                 |                |                                              |                |                            |                |
| Low RES                                                | .633*** (.056) | -.097*                                       | [-.160, -.043] | .097*                      | [.038, .163]   |
| Mean RES                                               | .380*** (.045) | -.058*                                       | [-.100, -.026] | .058*                      | [.022, .103]   |
| High RES                                               | .126 (.090)    | -.019                                        | [-.061, .006]  | .018                       | [-.006, .063]  |
| <i>RES*Control --&gt; Hindrance</i>                    |                |                                              |                |                            |                |
| Low Control                                            | .372*** (.067) | .101*                                        | [.060, .159]   | -.055*                     | [-.092, -.026] |
| Mean Control                                           | .240*** (.049) | .065*                                        | [.036, .104]   | -.035*                     | [-.062, -.016] |
| High Control                                           | .108 (.072)    | .029                                         | [-.007, .074]  | -.015                      | [-.046, .003]  |
| <b>Work demand: Time Pressure (TP)</b>                 |                |                                              |                |                            |                |
| <i>TP<sup>2</sup>*Support --&gt; Challenge</i>         |                |                                              |                |                            |                |
| Low TP and Low Support                                 | .073 (.093)    | -.007                                        | [-.038, .010]  | .010                       | [-.015, .045]  |
| Mean TP and Low Support                                | .076 (.072)    | -.007                                        | [-.028, .004]  | .010                       | [-.006, .037]  |
| High TP and Low Support                                | .078 (.152)    | -.007                                        | [-.049, .019]  | .010                       | [-.026, .064]  |
| Low TP and Mean Support                                | .220** (.067)  | -.020*                                       | [-.050, -.002] | .030*                      | [.010, .063]   |
| Mean TP and Mean Support                               | .053 (.049)    | -.005                                        | [-.018, .003]  | .007                       | [-.004, .026]  |
| High TP and Mean Support                               | -.115 (.104)   | .010                                         | [-.007, .043]  | -.015                      | [-.052, .010]  |
| Low TP and High Support                                | .367*** (.083) | -.033*                                       | [-.078, -.005] | .049*                      | [.018, .100]   |
| Mean TP and High Support                               | .030 (.076)    | -.003                                        | [-.022, .010]  | .004                       | [-.014, .031]  |
| High TP and High Support                               | -.308* (.154)  | .028                                         | [.000, .090]   | -.041*                     | [-.114, -.004] |
| <i>TP*Support --&gt; Hindrance</i>                     |                |                                              |                |                            |                |
| Low Support                                            | .520*** (.050) | .151*                                        | [.101, .213]   | -.053*                     | [-.101, -.004] |
| Mean Support                                           | .588*** (.036) | .171*                                        | [.115, .234]   | -.060*                     | [-.113, -.005] |
| High Support                                           | .657*** (.048) | .191*                                        | [.125, .266]   | -.067*                     | [-.127, -.005] |

Note: Low = values one SD below the mean; mean = values at the mean; high = values one SD above the mean. CI = confidence interval. BC = bias corrected. Standard errors in parentheses. \*\*\* p < .001; \*\* p < .01; \* p < .05. Asterisks beside the estimates of the indirect effects indicate that the 95 percent CI does not include 0
